# Supplementary material
Source: Springer Nature journal article supplement (https://www.springermedizin.de/resource/supplementary/12889_2006_1021_MOESM7_ESM.pdf/9503152)
Supplement: MOESM7 [file 9503152]

**Week 13**

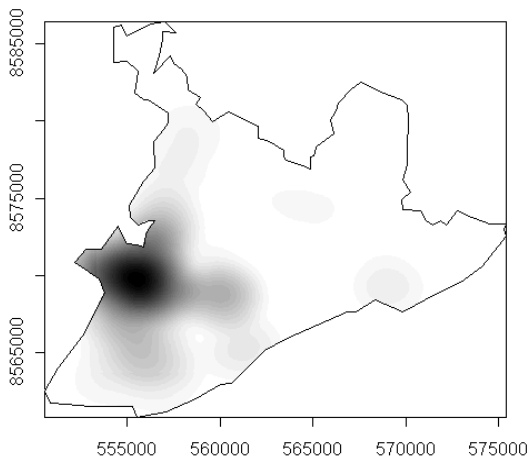

Nº de casos: 284

**Week 14**

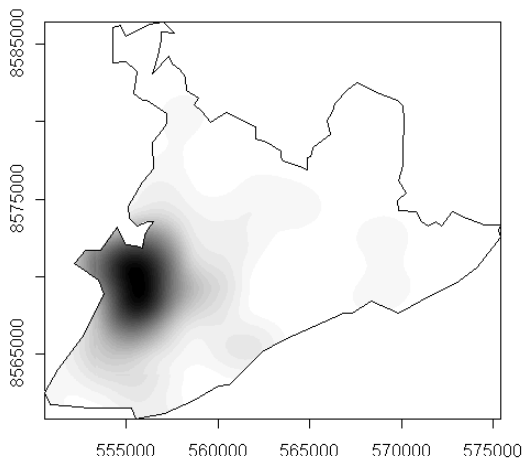

Nº de casos: 694

**Week 15**

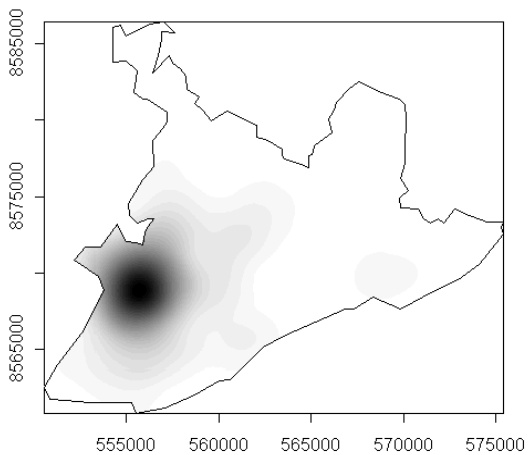

numbers of cases: 680

**Week 16**

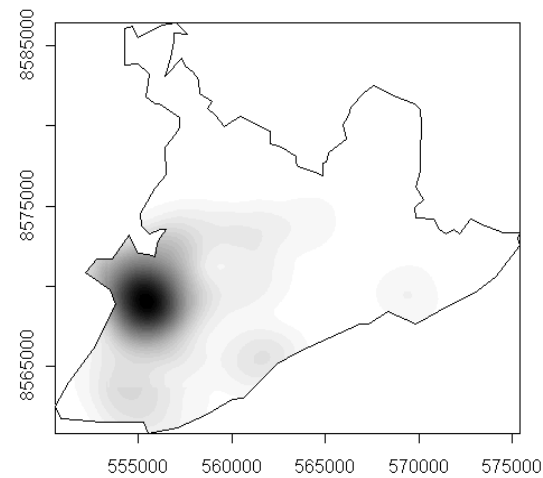

numbers of cases: 546

**Week 17**

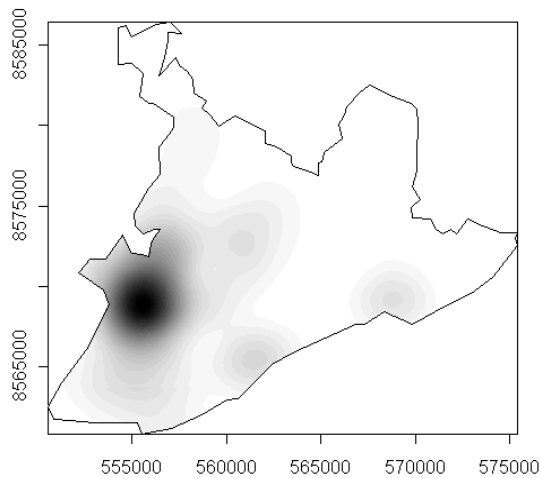

numbers of cases: 780

**Week 18**

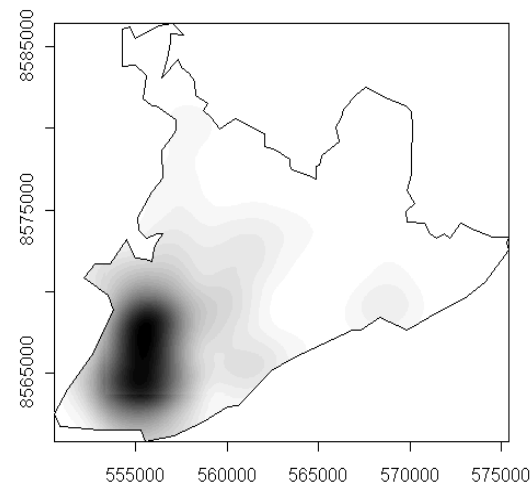

numbers of cases: 846
